# Supplementary material for: Diabetes Self-Management in the Digital Health Era: A Concept Analysis Using Natural Language Processing
Source: Research Square preprint supplement (doi:10.21203/rs.3.rs-8304580/v1), 2026-01-01
Supplement: Supplementary file 1 [file cb1a59933906fc686d432e10.docx]

**Diabetes Self-Management in the Digital Health Era: A Concept Analysis Using Natural Language Processing**

**SUPPLEMENTARY MATERIAL**

CONTENTS

[Supplementary Table 1. Comprehensive Database Search Strategies 1](#_Toc215193532)

[Supplementary Table 2. Descriptive Characteristics and Phase Assignments of Included Studies 5](#_Toc215193541)

[Supplementary Table 3. Cross-Reviewer Coding Comparison and Fleiss’ Kappa Classification 13](#_Toc215193542)

[REFERENCES 30](#_Toc215193543)

# Supplementary Table 1. Comprehensive Database Search Strategies

**Librarian Searcher:** Aaliyah Alvin, Duke University Medical Center Library and Archives

**Peer Reviewer:** Leila Ledbetter, MLIS AHIP, Duke University Medical Center Library and Archives

**Search Date**: 4/14/25

1. **Database / Study Registry (including vendor/platform):** MEDLINE (PubMed)

Inclusive Date Coverage: 1966 to present

| Set | Search Strategy | Results |
| --- | --- | --- |
| 1  T2D | "Diabetes Mellitus, Type 2"[Mesh] OR "Hyperglycemia"[Mesh] OR "Hypoglycemia"[Mesh] OR T2D[tiab] OR T2DM[tiab] OR "type 2 diabetes"[tiab] OR "type two diabetes"[tiab] OR "type ii diabetes"[tiab] OR a1c[tiab] OR hypoglycemia[tiab] OR hypoglycemic[tiab] OR hypoglycemics[tiab] OR hyperglycemia[tiab] OR hyperglycemic[tiab] OR hyperglycemics[tiab] OR "diabetes mellitus"[tiab] OR "continuous glucose monitor"[tiab] OR "continuous glucose monitoring"[tiab] OR CGM[tiab] | 555,048 |
| 2  digital health | "Telemedicine"[Mesh:NoExp] OR "digital health"[tiab] OR "electronic health"[tiab] OR mHealth[tiab] OR eHealth[tiab] OR telehealth[tiab] OR tele-care[tiab] OR telecare[tiab] OR "tele care"[tiab] OR telemedicine[tiab] OR tele-medicine[tiab] OR "tele medicine"[tiab] OR "remote monitor"[tiab] OR "remote monitors"[tiab] OR "remote monitoring" OR "remote monitored"[tiab] OR "mobile health"[tiab] OR "digital intervention"[tiab] OR "digital interventions"[tiab] OR "mobile app"[tiab] OR "mobile apps"[tiab] OR "mobile application"[tiab] OR "mobile applications"[tiab] OR "web based"[tiab] OR web-based[tiab] OR "smart watch"[tiab] OR "smart watches"[tiab] OR "apple watch"[tiab] OR "apple watches"[tiab] OR garmin[tiab] OR smartphone[tiab] OR "smart phone"[tiab] OR "smart-phone"[tiab] OR smartphones[tiab] OR "smart phones"[tiab] OR "smart-phones"[tiab] OR "social media"[tiab] OR teleconsultation[tiab] OR teleconsultations[tiab] OR tele-consultation[tiab] OR tele-consultations[tiab] OR "digital consultations"[tiab] OR "digital consultation"[tiab] OR "digital consult"[tiab] OR "digital consults"[tiab] OR "smart health"[tiab] OR "remote healthcare"[tiab] OR "remote health care"[tiab] OR "remote health-care"[tiab] OR "virtual medicine"[tiab] | 245,222 |
| 3  self-management | "Self-Management"[Mesh] OR "Self Care"[Mesh] OR self-management[tiab] OR self-manage[tiab] OR self-manages[tiab] OR self-managed[tiab] OR self-managing[tiab] OR "self management"[tiab] OR "self manage"[tiab] OR "self manages"[tiab] OR "self managed"[tiab] OR "self managing"[tiab] OR self-care[tiab] OR "self care"[tiab] OR self-monitoring[tiab] OR self-monitors[tiab] OR self-monitored[tiab] OR "self monitoring"[tiab] OR "self monitors"[tiab] OR "self monitored"[tiab] OR personalized[tiab] | 211,747 |
| 4  combine | #1 AND #2 AND #3 | 2,291 |
| 5  date filter | #4 AND (2015:2025[pdat]) | 1,982 |
| 6  publication types | #5 NOT (Editorial[pt] OR Letter[pt] OR Case Reports[pt] OR Comment[pt] OR Congress[pt]) | 1,940 |
| 7  adults only | #6 NOT (("Adolescent"[Mesh] OR "Child"[Mesh] OR "Infant"[Mesh]) NOT "Adult"[Mesh]) | 1,848 |
| 8  English only | #7 AND english [LA] | 1,830 |

1. **Database / Study Registry (including vendor/platform):** CINAHL (EBSCOhost)

Inclusive Date Coverage: 1946- Present

| Set | Search Strategy | Results |
| --- | --- | --- |
| 1  T2D | MH "Diabetes Mellitus, Type 2" OR MH "Hyperglycemia" OR MH "Hypoglycemia" OR TI(T2D OR T2DM OR "type 2 diabetes" OR "type two diabetes" OR "type ii diabetes" OR a1c OR hypoglycemia OR hypoglycemic OR hypoglycemics OR hyperglycemia OR hyperglycemic OR hyperglycemics OR "diabetes mellitus" OR "continuous glucose monitor" OR "continuous glucose monitoring" OR CGM) OR AB(T2D OR T2DM OR "type 2 diabetes" OR "type two diabetes" OR "type ii diabetes" OR a1c OR hypoglycemia OR hypoglycemic OR hypoglycemics OR hyperglycemia OR hyperglycemic OR hyperglycemics OR "diabetes mellitus" OR "continuous glucose monitor" OR "continuous glucose monitoring" OR CGM) | 159,219 |
| 2  digital health | MH "Telemedicine" OR TI("digital health" OR "electronic health" OR mHealth OR eHealth OR telehealth OR tele-care OR telecare OR "tele care" OR telemedicine OR tele-medicine OR "tele medicine" OR "remote monitor" OR "remote monitors" OR "remote monitoring" OR "remote monitored" OR "mobile health" OR "digital intervention" OR "digital interventions" OR "mobile app" OR "mobile apps" OR "mobile application" OR "mobile applications" OR "web based" OR web-based OR "smart watch" OR "smart watches" OR "apple watch" OR "apple watches" OR garmin OR smartphone OR "smart phone" OR "smart-phone" OR smartphones OR "smart phones" OR "smart-phones" OR "social media" OR teleconsultation OR teleconsultations OR tele-consultation OR tele-consultations OR "digital consultations" OR "digital consultation" OR "digital consult" OR "digital consults" OR "smart health" OR "remote healthcare" OR "remote health care" OR "remote health-care" OR "virtual medicine") OR AB("digital health" OR "electronic health" OR mHealth OR eHealth OR telehealth OR tele-care OR telecare OR "tele care" OR telemedicine OR tele-medicine OR "tele medicine" OR "remote monitor" OR "remote monitors" OR "remote monitoring" OR "remote monitored" OR "mobile health" OR "digital intervention" OR "digital interventions" OR "mobile app" OR "mobile apps" OR "mobile application" OR "mobile applications" OR "web based" OR web-based OR "smart watch" OR "smart watches" OR "apple watch" OR "apple watches" OR garmin OR smartphone OR "smart phone" OR "smart-phone" OR smartphones OR "smart phones" OR "smart-phones" OR "social media" OR teleconsultation OR teleconsultations OR tele-consultation OR tele-consultations OR "digital consultations" OR "digital consultation" OR "digital consult" OR "digital consults" OR "smart health" OR "remote healthcare" OR "remote health care" OR "remote health-care" OR "virtual medicine") | 104,411 |
| 3  self-management | MH "Self-Management" OR MH "Self Care" OR TI(self-management OR self-manage OR self-manages OR self-managed OR self-managing OR "self management" OR "self manage" OR "self manages" OR "self managed" OR "self managing" OR self-care OR "self care" OR self-monitoring OR self-monitors OR self-monitored OR "self monitoring" OR "self monitors" OR "self monitored" OR personalized) OR AB(self-management OR self-manage OR self-manages OR self-managed OR self-managing OR "self management" OR "self manage" OR "self manages" OR "self managed" OR "self managing" OR self-care OR "self care" OR self-monitoring OR self-monitors OR self-monitored OR "self monitoring" OR "self monitors" OR "self monitored" OR personalized) | 95,548 |
| 4  combine | S1 AND S2 AND S3 | 675 |
| 5  date filter | Publication Date: 20150101-20251231 | 544 |
| 6  publication types | S5 NOT PT (Book OR Book Chapter OR Book Review OR Commentary OR Editorial OR Letter) | 543 |
| 7  adults only | S6 NOT ((MH "Child+" OR MH "Minors (Legal) OR MH "Adolescence") NOT "Adult") | 525 |
| 8  English only | Narrow By Language: - English | 509 |

1. **Database / Study Registry (including vendor/platform):** IEEE Xplore Digital Library

Inclusive Date Coverage: 1884- Present

| Set | Search Strategy | Results |
| --- | --- | --- |
| 1  T2D | ("Document Title":diabetes OR "Document Title":a1c OR "Document Title":"glucose monitor*") OR ("Abstract":diabetes OR "Abstract":a1c OR "Abstract":"glucose monitor*") | 8,226 |
| 2  digital health | ("Document Title":digital OR "Document Title":electronic OR "Document Title":mHealth OR "Document Title":eHealth OR "Document Title":tele* OR "Document Title":remote OR "Document Title":mobile OR "Document Title":web OR "Document Title":smartphone OR "Document Title":"social media" OR "Document Title":virtual) OR ("Abstract":digital OR "Abstract":electronic OR "Abstract":mHealth OR "Abstract":eHealth OR "Abstract":tele* OR "Abstract":remote OR "Abstract":mobile OR "Abstract":web OR "Abstract":smartphone OR "Abstract":"social media" OR "Abstract":virtual) | 1,015,724 |
| 3  self-management | ("Document Title":self-manag* OR "Document Title":self-care OR "Document Title":self-monitor* OR "Document Title":personalized) OR ("Abstract":self-manag* OR "Abstract":self-care OR "Abstract":self-monitor* OR "Abstract":personalized) | 28,630 |
| 4  combine | #1 AND #2 AND #3 | 222 |
| 5  date filter | Range: 2015-2025 | 167 |
| 5  publication types | Filters Applied: Journals, Magazines, Books | 36 |

# Supplementary Table 2. Descriptive Characteristics and Phase Assignments of Included Studies

This table summarizes the descriptive characteristics of all included studies. Information presented includes the first author and publication year, country or region, study design, sample or population characteristics, and the assigned review phase (Phase 1: manual analysis or Phase 2: NLP-Based analysis).

| Author | Year | Country | Study Design | Sample/Population | Review Phase Assignment |
| --- | --- | --- | --- | --- | --- |
| Abidi et al. 1 | 2018 | Canada | Development and Implementation Study | Primary care practitioners + patients with T2DM | Phase 2 (NLP-Based Analysis) |
| Agarwal et al. 2 | 2019 | Canada | Randomized Controlled Trial | 223 adults with T2DM (HbA1c ≥8.0%) | Phase 2 (NLP-Based Analysis) |
| Aghdam et al. 3 | 2021 | Australia | Qualitative study | 15 adults with T2DM (interviews) + 2,312 Reddit threads (Online) | Phase 2 (NLP-Based Analysis) |
| Aligholipour et al. 4 | 2019 | Iran | Randomized Controlled Trial | 66 patients with T2DM | Phase 1 (Manual Review) |
| AlOsaimi et al. 5 | 2025 | Saudi Arabia | Cross-sectional Survey | 267 adults with T2DM | Phase 2 (NLP-Based Analysis) |
| Andrews et al. 6 | 2017 | USA | Qualitative study | 18 adults with poorly controlled T2DM in a telemedicine program | Phase 1 (Manual Review) |
| Arévalo Avalos et al. 7 | 2024 | USA | Quasi-Experimental Case Study | 330 Medicaid patients with uncontrolled diabetes + 2,118 waitlist controls | Phase 2 (NLP-Based Analysis) |
| Ayre et al. 8 | 2019 | Australia | Qualitative study | 25 primary care physicians on app integration | Phase 2 (NLP-Based Analysis) |
| Baptista et al. 9 | 2019 | Australia | Survey + Qualitative | 339 adults with T2DM in MILES-2 Study | Phase 1 (Manual Review) |
| Baptista et al. 10 | 2020 | Australia | Qualitative | 19 users with T2DM using a diabetes coaching app | Phase 2 (NLP-Based Analysis) |
| Barber-Gumbs et al. 11 | 2021 | USA | Qualitative study | 78 participants (28 with T2DM/prediabetes, 30 family/friends, 20 providers) | Phase 2 (NLP-Based Analysis) |
| Basilico et al. 12 | 2016 | Italy | Evaluation and Development Framework | 952 apps screened, 41 analyzed for diabetes self-care | Phase 2 (NLP-Based Analysis) |
| Boels et al. 13 | 2018 | Netherlands | Randomized Controlled Trial (protocol) | Planned N=228 insulin-treated patients with T2DM | Phase 1 (Manual Review) |
| Bults et al. 14 | 2023 | Netherlands | Qualitative study | 25 adults with T2DM testing 4 apps (Clear.bio, mySugr, MiGuide, Selfcare) | Phase 2 (NLP-Based Analysis) |
| Burgermaster et al. 15 | 2023 | USA | Mixed-methods (Pilot RCT + Qualitative) | 53 adults with T2DM from underserved minority groups | Phase 1 (Manual Review) |
| Burner et al. 16 | 2018 | USA | Qualitative study | 24 patients with T2DM | Phase 2 (NLP-Based Analysis) |
| Cassimatis et al. 17 | 2015 | Australia | Randomized Controlled Trial (protocol) | Planned N=210 adults with T2DM | Phase 1 (Manual Review) |
| Cassimatis et al. 18 | 2015 | Australia | Development study | 13 patients with T2DM, 12 general practitioners | Phase 2 (NLP-Based Analysis) |
| Chen et al. 19 | 2020 | China | Cross-sectional survey | 1241 adults with T2DM or prediabetes | Phase 2 (NLP-Based Analysis) |
| Dack et al. 20 | 2019 | UK | Development study | Development process and content of a digital self-management intervention for people with type 2 diabetes (HeLP-Diabetes) | Phase 2 (NLP-Based Analysis) |
| Dao et al. 21 | 2019 | Australia | Qualitative study | 10 patients with T2DM, 4 GPs, 3 practice nurses | Phase 2 (NLP-Based Analysis) |
| De Frel et al. 22 | 2024 | Netherlands | Development and Usability Study | Patients with T2DM + healthcare professionals (co-design) | Phase 1 (Manual Review) |
| Desveaux et al. 23 | 2018 | Canada | Qualitative study | 16 adults with T2DM using a mobile app | Phase 2 (NLP-Based Analysis) |
| Dsouza et al. 24 | 2024 | India | Qualitative study | 10 patients with T2DM, 6 healthcare providers | Phase 2 (NLP-Based Analysis) |
| Du Pon et al. 25 | 2020 | Netherlands | Randomized Controlled Trial | 203 patients with T2DM in primary care | Phase 2 (NLP-Based Analysis) |
| Dunkel et al. 26 | 2025 | Germany | Randomized Controlled Trial | 151 adults with T2DM | Phase 1 (Manual Review) |
| Fuji et al. 27 | 2015 | USA | Qualitative study | 59 patients with T2DM using a personal health record | Phase 2 (NLP-Based Analysis) |
| Ghodousi Moghadam et al. 28 | 2024 | Iran | Design and evaluation study | Development of a serious game “DiaPo” for T2DM self-management | Phase 2 (NLP-Based Analysis) |
| Gonzalez et al. 29 | 2024 | USA | Randomized Controlled Trial | 812 adults with T2DM (Telephonic Self-Management Support program) | Phase 2 (NLP-Based Analysis) |
| Gosak et al. 30 | 2022 | Slovenia | Randomized Controlled Trial (protocol) | Planned N=380 adults with T2DM | Phase 1 (Manual Review) |
| Goyal et al. 31 | 2016 | Canada | Randomized Controlled Trial (protocol) | Planned N=150 adults with T2DM | Phase 2 (NLP-Based Analysis) |
| Goyal et al. 32 | 2016 | Canada | Development study | Adults with T2DM (design-based, formative research) | Phase 2 (NLP-Based Analysis) |
| Hadjiconstantinou et al. 33 | 2020 | UK | Development Study | Adults with T2DM, clinicians (co-design of digital program) | Phase 2 (NLP-Based Analysis) |
| Hart et al. 34 | 2017 | Netherlands | Pilot study | 30 patients with well-controlled T2DM | Phase 1 (Manual Review) |
| Hawkes et al. 35 | 2024 | UK | Qualitative study | 19 adults with T2DM in the NHS “Healthy Living” program | Phase 2 (NLP-Based Analysis) |
| Higa et al. 36 | 2021 | USA | Design and implementation study | 7 dyads (patients with T2DM + family/friends) | Phase 2 (NLP-Based Analysis) |
| Holmen et al. 37 | 2016 | Norway | Secondary Data Analysis | 151 adults with T2DM in the eHealth intervention | Phase 1 (Manual Review) |
| Izahar et al. 38 | 2017 | Malaysia | Content Analysis of Apps | 35 mobile apps for diabetes self-management | Phase 2 (NLP-Based Analysis) |
| Jafari et al. 39 | 2021 | Iran | Qualitative study | 19 patients with T2DM, 2 nurses, 2 physicians | Phase 2 (NLP-Based Analysis) |
| Jeffrey et al. 40 | 2019 | Australia | Qualitative study | 30 adults with T2DM using mobile phone applications | Phase 1 (Manual Review) |
| Jeon and Park 41 | 2018 | South Korea | Development study | 19 diabetes patients (focus group interviews) + usability test participants | Phase 2 (NLP-Based Analysis) |
| Jiang et al. 42 | 2022 | Singapore | Randomized Controlled Trial | 114 adults with poorly controlled T2DM | Phase 2 (NLP-Based Analysis) |
| Joachim et al. 43 | 2022 | Australia | Development and Feasibility Study | Development and implementation of a nudge-inspired artificial intelligence (AI)-driven health platform for self-management of diabetes | Phase 2 (NLP-Based Analysis) |
| Johnson et al. 44 | 2023 | USA | Randomized Controlled Trial | 432 adults with T2DM (virtual learning environment) | Phase 2 (NLP-Based Analysis) |
| Ju et al. 45 | 2023 | USA | Pilot study | 39 adults with T2DM (A Nurse-Led Telehealth Program for Diabetes Foot Care) | Phase 2 (NLP-Based Analysis) |
| Karlsen et al. 46 | 2016 | Norway | Randomized Controlled Trial (protocol) | Planned N=172 adults with T2DM | Phase 1 (Manual Review) |
| Kelly et al. 47 | 2018 | UK | Qualitative study | 15 adults with T2DM using web/mobile technologies | Phase 2 (NLP-Based Analysis) |
| Kim and Utz 48 | 2019 | South Korea | Randomized Controlled Trial | 151 adults with T2DM (social media vs telephone vs usual care) | Phase 2 (NLP-Based Analysis) |
| Kim et al. 49 | 2022 | South Korea | Randomized Controlled Trial | 68 adults with T2DM (smartphone app–based integrated program) | Phase 2 (NLP-Based Analysis) |
| Kim et al. 50 | 2024 | South Korea | Mixed-methods Study | 16 adults with T2DM (automated personalized self-care program) | Phase 2 (NLP-Based Analysis) |
| Krall et al. 51 | 2023 | USA | Pilot Study + Survey (Mixed-methods) | 32 adults with T2DM (app intervention) + 60 providers | Phase 1 (Manual Review) |
| Krishnakumar et al. 52 | 2021 | India | Single-arm pre–post observational study | 102 adults with T2DM (Wellthy CARE platform) | Phase 2 (NLP-Based Analysis) |
| Lamprinos et al. 53 | 2016 | Germany and Turkey | Development and pilot study | 60 adults with T2DM + 12 health professionals | Phase 2 (NLP-Based Analysis) |
| Lee et al. 54 | 2022 | South Korea | Randomized Controlled Trial | 269 adults with T2DM (EMR-integrated mobile app) | Phase 2 (NLP-Based Analysis) |
| Lee et al. 55 | 2024 | South Korea | Randomized Controlled Trial | Initially included 121 adults with T2DM (automated personalized self-care program) | Phase 2 (NLP-Based Analysis) |
| Lee et al. 56 | 2024 | South Korea | Cross-sectional | 453 adults with T2DM, survey on electronic health literacy and self-management | Phase 2 (NLP-Based Analysis) |
| LeSeure et al. 57 | 2024 | USA | Development study | Development of a prototype diabetes management app for Portuguese Americans with type 2 diabetes mellitus | Phase 2 (NLP-Based Analysis) |
| Lewinski et al. 58 | 2021 | USA | Qualitative Descriptive Study | 20 adults with T2DM using multiple mobile health devices | Phase 1 (Manual Review) |
| Lie et al. 59 | 2018 | Norway | Qualitative study | 10 adults with T2DM completed the Guided Self-Determination eHealth intervention | Phase 2 (NLP-Based Analysis) |
| Lie et al. 60 | 2019 | Norway | Qualitative study | 10 adults with T2DM + 4 nurses in eHealth intervention | Phase 1 (Manual Review) |
| Liu et al. 61 | 2018 | China | Study Protocol | 250 adults with T2DM, testing the IMB model of self-management | Phase 2 (NLP-Based Analysis) |
| Maharaj et al. 62 | 2021 | New Zealand | Feasibility Randomized Controlled Trial | 58 adults with T2DM (comparing Glucose Buddy vs mySugr apps) | Phase 2 (NLP-Based Analysis) |
| Marini et al. 63 | 2023 | USA | Qualitative study | 71 adults with uncontrolled T2DM in the i-Matter trial | Phase 1 (Manual Review) |
| Mayberry et al. 64 | 2016 | USA | Development, Feasibility, and Usability study | 19 adults with T2DM (Family-Focused Diabetes Self-Care Support mHealth Intervention) | Phase 2 (NLP-Based Analysis) |
| Mayberry et al. 65 | 2021 | USA | Mixed-methods RCT | 512 adults with T2DM (Family-focused Add-on to Motivate Self-care Intervention) | Phase 2 (NLP-Based Analysis) |
| Mehraeen et al. 66 | 2021 | Iran | Descriptive and Analytical study | 22 endocrinologists and specialists identifying features of T2DM apps (n=34) | Phase 2 (NLP-Based Analysis) |
| Mehraeen et al. 67 | 2022 | Iran | Development study | Development of a mobile self-care app for patients with T2DM | Phase 2 (NLP-Based Analysis) |
| Mohammadi Zeidi et al. 68 | 2020 | Iran | Randomized Controlled Trial | 166 adults with T2DM (theory of planned behavior–enhanced intervention) | Phase 2 (NLP-Based Analysis) |
| Motamed-Jahromi et al. 69 | 2024 | Iran | Randomized Controlled Trial | 132 older adults with T2DM (mindfulness and self-regulatory intervention via social media) | Phase 2 (NLP-Based Analysis) |
| Nelson et al. 70 | 2018 | USA | Randomized Controlled Trial (protocol) | Planned N=512 adults with T2DM | Phase 1 (Manual Review) |
| Nelson et al. 71 | 2020 | USA | Randomized Controlled Trial | 256 adults with T2DM (12-month text-message diabetes support intervention) | Phase 2 (NLP-Based Analysis) |
| Öberg et al. 72 | 2018 | Sweden | Qualitative study | 11 adults with T2DM in primary care | Phase 2 (NLP-Based Analysis) |
| Or et al. 73 | 2020 | Hong Kong | Randomized Controlled Trial | 299 adults with T2DM and hypertension (24-week trial of technological surrogate nursing) | Phase 2 (NLP-Based Analysis) |
| Pal et al. 74 | 2018 | UK | Qualitative study | 20 adults with T2DM | Phase 1 (Manual Review) |
| Pamungkas et al. 75 | 2022 | Indonesia | Randomized Controlled Trial | 60 adults with uncontrolled T2DM (smartphone coaching app intervention) | Phase 2 (NLP-Based Analysis) |
| Park and Park 76 | 2024 | South Korea | Randomized Controlled Trial | 120 older adults with T2DM (DiaNote app + nurse phone visits) | Phase 2 (NLP-Based Analysis) |
| Pérez-Aldana et al. 77 | 2021 | USA | Secondary Data Analysis | 20 adults with T2DM + 4 providers in a virtual environment | Phase 1 (Manual Review) |
| Prihatin Putri et al. 78 | 2022 | Indonesia | Mixed-methods protocol | Development and evaluation of the Integrated Diabetes Self-Management (IDSM) mobile app | Phase 2 (NLP-Based Analysis) |
| Rangraz Jeddi et al. 79 | 2020 | Iran | Cross-sectional study | 176 adults with T2DM, survey on mobile phone usage and intention for self-management | Phase 2 (NLP-Based Analysis) |
| Rishaug et al. 80 | 2025 | Norway | Qualitative study | 16 adults with pre-diabetes/T2DM in user preferences for the e-health program | Phase 2 (NLP-Based Analysis) |
| Ruiz-Leon et al. 81 | 2025 | Spain | Randomized Controlled Trial | 123 adults with T2DM (mHealth behavioral treatment for lifestyle modification) | Phase 2 (NLP-Based Analysis) |
| Safdari et al. 82 | 2025 | Iran | Randomized Controlled Trial | 76 patients with T2DM (social media–based education on self-care, literacy, HbA1c) | Phase 2 (NLP-Based Analysis) |
| Salari et al. 83 | 2021 | Iran | Development and Usability Study | Development and pilot testing of a mobile/cloud-based T2DM self-management system | Phase 2 (NLP-Based Analysis) |
| Sarfati et al. 84 | 2018 | New Zealand | Randomized Controlled Trial (protocol) | Planned N=430 adults with T2DM or pre-diabetes | Phase 1 (Manual Review) |
| Shahshahani et al. 85 | 2023 | Iran | Randomized Controlled Trial (protocol) | 70 adults with T2DM (web-based DSMES program vs routine education) | Phase 2 (NLP-Based Analysis) |
| Sherifali et al. 86 | 2019 | Canada | Randomized Controlled Trial (design and baseline) | 686 adults with T2DM (Diabetes health coaching intervention for self-management) | Phase 2 (NLP-Based Analysis) |
| Tatara et al. 87 | 2017 | Norway | Cross-sectional survey | 176 first-generation Pakistani immigrants with high T2DM risk, investigated factors and types of eHealth use | Phase 2 (NLP-Based Analysis) |
| Torbjørnsen et al. 88 | 2018 | Norway | Secondary Data Analysis | 75 adults with T2DM in RENEWING HEALTH project. | Phase 1 (Manual Review) |
| Turnbull et al. 89 | 2020 | UK | Qualitative study | 21 adults with T2DM using digital self-care technologies | Phase 1 (Manual Review) |
| Ufholz et al. 90 | 2025 | USA | Qualitative study | 20 adults with T2DM and obesity in an 18-month Zoom-based virtual peer support group intervention | Phase 2 (NLP-Based Analysis) |
| Vallis et al. 91 | 2023 | Canada | Qualitative study | 13 adults with T2DM using CGM ≥6 months, interviews on motivation and self-management | Phase 2 (NLP-Based Analysis) |
| Wang et al. 92 | 2018 | Singapore | Randomized Controlled Trial (protocol) | Planned N=128 adults with poorly controlled T2DM | Phase 1 (Manual Review) |
| Woldamanuel et al. 93 | 2023 | Sweden | Qualitative study | 14 patients with prediabetes or T2DM and 10 HCPs, focus groups on eHealth for physical activity | Phase 2 (NLP-Based Analysis) |
| Wu et al. 94 | 2023 | China | Mixed-methods protocol | Planned N=664 adults with T2DM (Cluster RCT + interviews, AI-based health education linking system: AI-HEALS) | Phase 2 (NLP-Based Analysis) |
| Xia et al. 95 | 2022 | China | Randomized Controlled Trial | 156 adults with T2DM (TangPlan + WeChat combined self-management support) | Phase 2 (NLP-Based Analysis) |
| Yaagoob et al. 96 | 2024 | Saudi Arabia | Randomized Controlled Trial | 80 adults with T2DM (WhatsApp-based DSMES program) | Phase 2 (NLP-Based Analysis) |
| Yoon et al. 97 | 2022 | Singapore | Qualitative study | 29 adults with T2DM | Phase 2 (NLP-Based Analysis) |

# Supplementary Table 3. Cross-Reviewer Coding Comparison and Fleiss’ Kappa Classification

1. **Cross-Reviewer Classification Comparison Matrix**

| Antecedents Unit | Reviewer A | Reviewer B | Reviewer C | Supporting Quotation(s) | Characteristics |
| --- | --- | --- | --- | --- | --- |
| A1 | **.** | **Complexity and Disease Burden** | **Demands of Diabetes Self-Management** | Diabetes self-management, which includes adjustments to diet, exercise, medication, and self-monitoring, among other factors, is a fundamental factor in the successful treatment of type 2 diabetes (T2DM). (Dunkel et al., 2025) | behavioral burden, disease complexity, daily self-management routines |
|  |  |  |  | Diabetes self-management is described as an active proactive and ongoing process that includes behaviours such as healthy eating, regular physical activity, blood glucose monitoring and medication taking, as well as problem-solving and healthy coping.4 Achieving appropriate self-management is, however, complex.5 7 Owing to this complexity, research has indicated that individuals consider attainment of treatment goals challenging, and many individuals fail to achieve optimal treatment outcomes. (Karlsen et al., 2016) |  |
|  |  |  |  | Depression and anxiety are significantly more prevalent in people with diabetes than in the general population. Comorbid mental health conditions are barriers to effective diabetes self-care and further increase diabetes-related expenditures. (Cassimatis et al., 2015) |  |
|  |  |  |  | However, due to the chronic nature of the disease and given that there are some limitations, such as lack of adequate time, cost and lack of patients’ continuous referral to the clinics |  |
|  |  |  |  | For patients with complex conditions such as PPDM, engagement with health care is affected by the balance between their workload … and their capacity to address their demands |  |
| A2 | **Motivation and Self Efficacy** | **Self-Regulation and Motivation** | **Emotional Readiness for Change** | Motivation and engagement are at the heart of many behavioral theories. Specifically, Self-Determination Theory (SDT) proposes that individuals’ motivation to engage in specific activities aligns along a self-determination continuum [22]. In SDT, self-regulation refers to individuals’ ability to process and internalize extrinsic motivating factors and to use these factors to drive one’s behaviors. (Burgermaster et al., 2023) | motivation, self-efficacy, autonomy, emotional readiness |
|  |  |  |  | focused on fostering individuals’ intrinsic motivation, for example in the context of adherence to medication and blood pressure monitoring [28], and on promoting an individual’s sense of autonomy by helping them to focus on their own reasons for increasing levels of physical activity and exercise [29]. (Burgermaster et al., 2023) |  |
|  |  |  |  | patients were driven by internal motivating factors that bolstered their engagement and helped them feel accountable for their diabetes” (Marini et al.,2023 ) |  |
|  |  |  |  | There are four different levels of extrinsic motivation associated with four different styles of self-regulation … external, introjected, identified, and integrated |  |
|  |  |  |  | patients’ sense of autonomy is facilitated in this eHealth care approach, as it may produce an experience of self-governance and volition” (Lie et al.,2019) |  |
| A3 | **Patient Clinician Factors** | **Educational / Supportive System & Social Interaction** | **Access to Education and Ongoing Support** | Both self-management support and medication management rely on regular, supportive interactions between patients and providers, which can be achieved more frequently and at lesser burden to patients when carried out via phone. (Andrews, 2017) | education, empowerment, social support, continuity of care |
|  |  |  |  | Proper self-care and adherence to recommendations require tailored patient education and support by physicians and nurses. Effective patient education leads to positive health outcomes and patients with diabetes are typical clients who need effective education for proper self-care. (Aligholipour et al., 2018) |  |
|  |  |  |  | patient–nurse relationship involves these factors and may enhance the patient’s health and strengthen the patient’s own resources for maintaining physical, emotional, mental and social well-being(Lie et al ., 2019) |  |
|  |  |  |  | participants reported difficulties getting the information and patient-centered care they needed to support self-management when consultations with health professionals were too time-pressured or protocol-driven to accommodate individual patient needs. (Pal et al., 2018) |  |
|  |  |  |  | Proper self-care and adherence to recommendations require tailored patient education and support by physicians and nurses |  |
| A4 | **Access to Technology** | **Autonomy and Active Engagement in Digital Self-Management (Socioeconomic Resources and Inequality Factors)** | **Access to Resources and Technology** | User-centred diabetes apps have the potential to improve health outcomes, particularly in rural areas where access to formal health services is relatively restricted. (Jeffrey et al., 2019) | digital facilitation, access to technology, usability, digital literacy |
|  |  |  |  | Given the fact that adults with T2DM implement the majority of self-management tasks, these tasks need to be facilitated by support from healthcare professionals. Such support is required for implementing and sustaining coping skills and behaviours needed to self-manage on a continuing basis. (Karlsen et al., 2016) |  |
|  |  |  |  | Continuous follow-up through texting and electronic methods in emergency care, home care, caring for chronic and injured people in disasters, especially in patients in remote rural areas having low access to educational programs allows patients to be encouraged to take care of themselves and participate more in controlling and preventing the next acute and chronic complications. (Aligholipour et al., 2019) |  |
|  |  |  |  | digital health technologies are positioned as contributing to lay people effectively becoming the ‘managers’ of their own health and health care.”(Turnbull et al.,2020 ) |  |
|  |  |  |  | A mobile app strengthens self-care and contributes to better information, health education, and self-confidence in dealing with the disease” (Gosak et al.2022,) |  |
| A5 | **Individual Factors** | **.** | **.** | however, non-whites and those with less education and income are less likely to own a smartphone”(Nelson et al.,2018) | social determinants, health equity |
|  |  |  |  | A higher stage of change in dietary habits is associated with being female and married, and with older age” (Holmen et al.,2016) |  |
|  |  |  |  | Studies have shown that people with higher levels of lifestyle-related knowledge (eg, influence of diet on glucose levels) tend to make healthier choices to improve their glycemic control.” (DeFreal et al.,2024) |  |
| Attributes Unit | **Reviewer A** | **Reviewer B** | **Reviewer C** | **Supporting Quotation(s)** | **Characteristics** |
| T1 | **Health Engagement** | **Complexity & Continuity** | **Daily Behavioral and Lifestyle Components** | Managing diabetes requires adherence to a specific low-calorie diet, regular exercise, continuous intake of oral medications or insulin injections, and ongoing blood glucose monitoring. Involves multiple domains of activity (diet, exercise, blood sugar testing, medication adherence, foot care, smoking cessation). (Aligholipour et al., 2021) | daily self-management, lifestyle behaviors, behavioral routines |
|  |  |  |  | Actively monitor their medical conditions and adjust their lifestyles as they perform self-care activities such as diet control, regular physical exercise, medication compliance, regular self-monitoring of blood glucose levels, attending foot screenings, follow-up for medical consultation and managing stress levels” (Wang et al., 2018**)** |  |
|  |  |  |  | Although treatment and control of diabetes is very complicated, yet the patients can have an effective control on their blood sugar levels and prevent acute and chronic complications by adherence to specific low-calorie diet, exercise program, continuous intake of oral medications or insulin injections |  |
|  |  |  |  | Patients must also manage comorbid conditions, complex treatment regimens, and lifestyle changes on a daily, continuous, and lifelong basis. (Andrews et al., 2017) |  |
|  |  |  |  | Self-management requires ongoing adaptation to changing health conditions, lifestyle demands, and environmental factors. (Boels et al., 2018) |  |
| T2 | **Executive Competence** | **Self-Regulation & Motivation** | **Cognitive and Psychological Determinants of Self-Management** | Effective self-management is supported by patient knowledge of disease processes, practical skills in monitoring and treatment, and consistent engagement in self-care behaviors. (Aligholipour et al., 2021) | motivation, self-regulation, self-efficacy, cognitive competence |
|  |  |  |  | Effective self-management involves acquiring skills and techniques, developing a constructive attitude, and engaging positively in life. It also includes emotional well-being, health service navigation, social integration, and the ability to locate and use necessary resources. (Holmen et al., 2016) |  |
|  |  |  |  | independently organize and manage life with the chronic disease diabetes according to one’s own goals and values and includes the ability to set goals and successfully implement them strategically (Dunkel et al.,2025) |  |
|  |  |  |  | requires each person to make a multitude of daily decisions and engage in complex care activities” (Lie et al., 2019) |  |
|  |  |  |  | Motivation and engagement are central to initiating and sustaining self-management behaviors. Self-Determination Theory (SDT) emphasizes the role of intrinsic motivation, autonomy, and self-regulation in maintaining long-term behavior change. (Burgermaster et al., 2023) |  |
| T3 | **.** | **Educational / Supportive System & Social Interaction** | **Social and Environmental Context** | Socioeconomic status influences access to resources, technology, and capacity for DSM. Individuals with fewer resources, lower health literacy, or marginalized social positions face greater challenges.  One argument for this shift is that digital health may reduce inequalities by increasing access to health interventions and by providing interventions that are tailored to the needs of the user (Turnbull et al., 2020) | social determinants, equity, social support, environmental context |
|  |  |  |  | Support from family and friends can influence diet, exercise, and medication adherence, either positively or negatively. (Nelson et al., 2018) |  |
|  |  |  |  | However, underrepresentation of racial, ethnic, and socio-economic minority groups in technology design may limit equity. Individuals residing in these communities are disproportionally impacted by chronic diseases and mental health conditions and are in a greater need for innovative technologies for self-monitoring and self-management [16]. Yet, these communities also experience greater barriers to engaging with health information technologies [17–19]. Previous research pointed out that individuals from structurally disadvantaged communities have less opportunity to engage in self-monitoring [20], and, specifically, in reflection and interpretation of the collected data to inform their self-management [15]. As a result, innovative technologies have the potential to exacerbate existing divides and create new intervention-generated inequalities [21]. (Burgermaster et al., 2023) |  |
|  |  |  |  | Patients experience challenges… including suboptimal patient–provider relationships and lack of social support |  |
|  |  |  |  | Self-care behaviors differ by ethnicity and self-efficacy; differences in perceptions have an impact on self-care behavior |  |
| T4 | **Digital Literacy** | **Digital Health–Driven Autonomy & Engagement** | **Digital Health for Diabetes Self-Management** | They were using technology in a way that has been described as digitizing the body, providing a different way of knowing and controlling the health status of a body when physical sensations are an insufficient guide. (Turnbull et al., 2020). | digital health, feedback systems, engagement, user experience |
|  |  |  |  | Integrating lifestyle and physiological monitoring with direct action–feedback loops enables personalized lifestyle advice. Home-monitored data (e.g., weight, blood pressure, heart rate, glucose) can be incorporated into electronic medical records for healthcare provider evaluation, supporting clinical decision-making. (De Frel et al., 2024). |  |
|  |  |  |  | engage with technology to refine care routines, whereas those less experienced use diabetes self-management tools to establish routines, for example by troubleshooting out-of-range blood glucose readings “(Baptisa et al.,) |  |
|  |  |  |  | demonstrated that positively framed SMS text messaging had a significant impact on engagement with the intervention (eg, higher response rate) of individuals with type 2 diabetes, which ultimately has an effect on behavior change”(Marini et al., 2023) |  |
|  |  |  |  | eHealth interventions have shown positive impacts on knowledge, social support, and behavioral outcomes |  |
| T5 | **Patient and Clinician Communication** | **Digital Health–Driven Autonomy & Engagement** | **Dynamic Patient–Provider Relationship** | Another common feature is interactive communication with health care providers” (Boels et al., 2018) | patient–provider communication, professional support, collaboration, continuity |
|  |  |  |  | providers participated in interactions where emotional support and appraisal support were exchanged, and they did so more frequently higher number of supportive relationships would be fostered among participants and providers, (Aldana et al., 2021 ) |  |
|  |  |  |  | successful use of mHealth tools and services requires an active user and cooperation with health professionals [4]. Use of mHealth often includes the possibility of sharing data between health professionals and their patients with diabetes” (Torbjornsen et al.,2018) |  |
|  |  |  |  | Devices can enhance but not replace the need for professional support and patient self-determination in managing the disease. (Lewinski et al., 2021) |  |
|  |  |  |  | Mobile health devices hold potential to improve T2DM self-management and empower patients to manage the disease; however, the devices alone do not manage the disease. (Lewinski et al., 2021) |  |
| T6 | **Executive Competence** | **Educational / Supportive System & Social Interaction (Need for Continuous Education and Behavioral Support)** | **Personalization and Person-Centered Care** | Tailored patient education and support from healthcare professionals, especially nurses, are essential for developing self-care capacity and confidence. (Aligholipour et al., 2021) | personalization, person-centered care, tailored support, autonomy |
|  |  |  |  | For example, participants expressing more self-directed styles value tools that assist them in making independent, informed decisions about their own care… messaging within an app needs to be presented as volitional choices rather than explicit directives and needs to acknowledge the user as an expert in their own care. (Baptista et al., 2020) |  |
|  |  |  |  | These findings have important implications for the design of future technologies for data-driven self-management. Most importantly, they highlight the need to tailor the design of these technologies to individuals’ styles of regulation and motivation in health. (Burgermaster et al., 2023) |  |
|  |  |  |  | Self-management requires ongoing adaptation to changing health conditions, lifestyle demands, and environmental factors. (Boels et al., 2018) |  |
|  |  |  |  | Differences between T2DM and T1DM in pathophysiology, symptoms, treatment, and self-management necessitate tailored strategies rather than a one-size-fits-all approach. (Karlsen et al., 2016) |  |
| Consequences Unit | **Reviewer A** | **Reviewer B** | **Reviewer C** | **Supporting Quotation(s)** | **Characteristics** |
| C1 | **Health Outcomes** | **Improved Glycemic Control and Health Outcomes (Physiological and Clinical Improvements)** | **Clinical and Health Outcomes** | Diabetes self-management behaviors, including blood glucose monitoring, healthy eating, being physically active and taking prescribed medications, can improve diabetes-related outcomes, reduce complications, and improve quality of life, but these behaviors can be difficult to initiate and sustain. (Baptista et al.) | glycemic control, clinical outcomes, behavioral adherence |
|  |  |  |  | Self-management forms a crucial part of type 2 diabetes treatment… These adaptations are necessary to achieve optimal glycaemic control (without much variability and hypoglycaemia) and weight loss, and to prevent both microvascular and macrovascular complications. (Boels et al.) |  |
|  |  |  |  | …have resulted in improvements in glycemic control , weight loss , patient satisfaction with healthcare, self-efficacy and adherence to medication” (Sarfati et al., 2018) |  |
|  |  |  |  | several of their health behaviors improved, including diet (eg, reducing carbohydrate intake or making healthier eating choices), physical activity, stress management (eg, yoga and meditation), sleep quality, weight loss, and overall control of their health (Marini et al.,2023) |  |
|  |  |  |  | Although treatment and control of diabetes is very complicated, yet the patients can have an effective control on their blood sugar levels and prevent acute and chronic complications by adherence to specific low-calorie diet, exercise program, continuous intake of oral medications or insulin injections so that they can have a quality life and a natural lifespan |  |
| C2 | **Psychological Outcomes** | **Improved Glycemic Control and Health Outcomes (Prevention of Complications and Enhanced Quality of Life)** | **Quality of Life and Psychosocial Well-being** | Diabetes self-management can improve quality of life and a normal lifespan… patients can have an effective control on their blood sugar levels and prevent acute and chronic complications by adherence to specific diet, exercise, and medication. (Aligholipour et al.) | quality of life, psychosocial well-being, emotional outcomes |
|  |  |  |  | Improvements in glycemic control do not generally result in significant improvements in mood… nor do psychological treatments for depression and anxiety in people with diabetes reliably produce improvements in glycemic control. (Cassimatis et al.) |  |
|  |  |  |  | Moreover, the effects of diabetes on quality of life, mental health, work productivity, and other intangible losses are substantial and add further to the diabetes-related burden to society. (Cassimatis et al.) |  |
|  |  |  |  | supports patients in prioritizing problems and self-determining their goals, thus stimulating patients’ autonomy and competence for self-managing diabetes(Lie et al., 2019) |  |
|  |  |  |  | patients developed more positive attitudes about their condition and their ability to effectively self-manage it (Marini et al., 2023) |  |
| C3 | **Psychological Outcomes** | **Psychosocial Empowerment and Motivation Reinforcement** | **Empowerment, Autonomy, and Motivation** | It is believed that self-efficacy leads to better self-management and, especially, long-term maintenance of the behavioural changes as well as lower HbA1c and better quality of life. (Dunkel et al.) | empowerment, self-efficacy, autonomy, motivation |
|  |  |  |  | As diabetes is a self-managed condition, successful models of care, especially for those who are not intrinsically motivated, must focus on strategies that promote and maintain autonomy. (Baptista et al.) |  |
|  |  |  |  | Patients became more confident in sharing the challenges of self-managing their diabetes. Getting to read the patients’ reflections improved their understanding… and created the possibility to address the psychosocial aspects of patients’ self-management. (Lie et al.) |  |
|  |  |  |  | Self-management behaviors can improve outcomes but are difficult to initiate and sustain—requiring motivation and self-efficacy | healthcare burden, economic efficiency, scalability, remote monitoring |
|  |  |  |  | Nurse-led self-care interventions and mHealth tools contributed to empowerment and improved confidence in managing diabetes |  |
| C4 | **Social Outcomes** | **Improved Glycemic Control and Health Outcomes (Prevention of Complications and Enhanced Quality of Life)** | **System-Level and Economic Implications** | Self-management has the potential to ease the burden on the healthcare system by encouraging patient autonomy and allowing disease monitoring outside clinical settings. (Jeffrey et al.) |  |
|  |  |  |  | Mobile apps show potential for disseminating self-care education; improving motivation, disease symptom management, and patient experience; and reducing care costs. (Gosak et al.) |  |
|  |  |  |  | Moreover, the effects of diabetes on quality of life, mental health, work productivity, and other intangible losses are substantial and add further to the diabetes-related burden to society. (Cassimatis et al. 2015) |  |
|  |  |  |  | Self-management diabetes interventions based on virtual environments enable diabetes education, the development of new skills, and the exchange of peer support in synchronous and asynchronous way (Aldan et al., 2021) |  |
| C5 | **.** | **Enhanced Digital Connectivity and Interaction** | **System-Level and Economic Implications** | Use of mHealth often includes the possibility of sharing data between health professionals and their patients with diabetes, which could enhance the support to improve their self-management | digital connectivity |
|  |  |  |  | These behavioral mechanisms … provide important insights to drive future development of mHealth interventions that could lead to sustained behavior change |  |

1. **Nominal Classification for Fleiss’ Kappa Analysis**

| Unit | Reviewer A | Reviewer B | Reviewer C |
| --- | --- | --- | --- |
| A1 | 0 | 1 | 1 |
| A2 | 2 | 2 | 2 |
| A3 | 3 | 3 | 3 |
| A4 | 4 | 4 | 4 |
| A5 | 5 | 0 | 0 |
| T1 | 1 | 1 | 1 |
| T2 | 2 | 2 | 2 |
| T3 | 0 | 3 | 3 |
| T4 | 4 | 4 | 4 |
| T5 | 5 | 5 | 5 |
| T6 | 6 | 6 | 6 |
| C1 | 1 | 1 | 1 |
| C2 | 2 | 2 | 2 |
| C3 | 3 | 3 | 3 |
| C4 | 4 | 0 | 4 |
| C5 | 0 | 5 | 5 |

*****Note**: The value “0” indicates that the coder did not identify (or “missed”) the corresponding unit.

# REFERENCES

1. Abidi, S., Vallis, M., Piccinini-Vallis, H., Imran, S. A. & Abidi, S. S. R. Diabetes-Related Behavior Change Knowledge Transfer to Primary Care Practitioners and Patients: Implementation and Evaluation of a Digital Health Platform. *JMIR Med Inform* **6**, e25 (2018).

2. Agarwal, P. *et al.* Mobile App for Improved Self-Management of Type 2 Diabetes: Multicenter Pragmatic Randomized Controlled Trial. *JMIR Mhealth Uhealth* **7**, e10321 (2019).

3. Aghdam, A. R., Watson, J., Miah, S. J. & Cliff, C. A novel information sharing framework for people living with type-2 diabetes in the context of a group education program. *Health Inf Sci Syst* **9**, 27 (2021).

4. Aligholipour, M., Feizollahzadeh, H., Ghaffari, M. & Jabbarzadeh, F. Comparison of In-Person and MMS -Based Education in Telegram on Self-care and Fasting Blood Sugar of Patients with Diabetes Mellitus: A Randomized Clinical Trials. *J Caring Sci* **8**, 157–164 (2019).

5. AlOsaimi, H. M. *et al.* Assessing intention to use mobile phone–based self-management support among adults with type 2 diabetes in Saudi Arabia: A cross-sectional study. *DIGITAL HEALTH* **11**, 20552076241308993 (2025).

6. Andrews, S. M. *et al.* Patient perceptions of a comprehensive telemedicine intervention to address persistent poorly controlled diabetes. *PPA* **Volume 11**, 469–478 (2017).

7. Arévalo Avalos, M. R. *et al.* Implementation of a Technology-Enabled Diabetes Self-Management Peer Coaching Intervention for Patients With Poorly Controlled Diabetes: Quasi-Experimental Case Study. *JMIR Diabetes* **9**, e54370 (2024).

8. Ayre, J. *et al.* Factors for Supporting Primary Care Physician Engagement With Patient Apps for Type 2 Diabetes Self-Management That Link to Primary Care: Interview Study. *JMIR Mhealth Uhealth* **7**, e11885 (2019).

9. Baptista, S. *et al.* What Do Adults with Type 2 Diabetes Want from the “Perfect” App? Results from the Second Diabetes MILES: Australia (MILES-2) Study. *Diabetes Technology & Therapeutics* **21**, 393–399 (2019).

10. Baptista, S. *et al.* User Experiences With a Type 2 Diabetes Coaching App: Qualitative Study. *JMIR Diabetes* **5**, e16692 (2020).

11. Barber-Gumbs, T. *et al.* Perspectives From Underserved African Americans and Their Health Care Providers on the Development of a Diabetes Self-Management Smartphone App: Qualitative Exploratory Study. *JMIR Form Res* **5**, e18224 (2021).

12. Basilico, A., Marceglia, S., Bonacina, S. & Pinciroli, F. Advising patients on selecting trustful apps for diabetes self-care. *Computers in Biology and Medicine* **71**, 86–96 (2016).

13. Boels, A. M., Rutten, G., Zuithoff, N., De Wit, A. & Vos, R. Effectiveness of diabetes self-management education via a smartphone application in insulin treated type 2 diabetes patients – design of a randomised controlled trial (‘TRIGGER study’). *BMC Endocr Disord* **18**, 74 (2018).

14. Bults, M., Van Leersum, C. M., Olthuis, T. J. J., Bekhuis, R. E. M. & Den Ouden, M. E. M. Mobile Health Apps for the Control and Self-management of Type 2 Diabetes Mellitus: Qualitative Study on Users’ Acceptability and Acceptance. *JMIR Diabetes* **8**, e41076 (2023).

15. Burgermaster, M. *et al.* Who needs what (features) when? Personalizing engagement with data-driven self-management to improve health equity. *Journal of Biomedical Informatics* **144**, 104419 (2023).

16. Burner, E. R. E. *et al.* Perceptions of Family Among Low-Income Patients With Diabetes in a Text-Based Mobile Health Intervention. *J Diabetes Sci Technol* **12**, 1203–1210 (2018).

17. Cassimatis, M. *et al.* Development of the OnTrack Diabetes Program. *JMIR Res Protoc* **4**, e24 (2015).

18. Cassimatis, M. *et al.* The OnTrack Diabetes Web-Based Program for Type 2 Diabetes and Dysphoria Self-Management: A Randomized Controlled Trial Protocol. *JMIR Res Protoc* **4**, e97 (2015).

19. Chen, Z., Zhang, C. & Fan, G. Interrelationship between Interpersonal Interaction Intensity and Health Self-Efficacy in People with Diabetes or Prediabetes on Online Diabetes Social Platforms: An In-Depth Survey in China. *IJERPH* **17**, 5375 (2020).

20. Dack, C. *et al.* A digital self-management intervention for adults with type 2 diabetes: Combining theory, data and participatory design to develop HeLP-Diabetes. *Internet Interventions* **17**, 100241 (2019).

21. Dao, J., Spooner, C., Lo, W. & Harris, M. F. Factors influencing self-management in patients with type 2 diabetes in general practice: a qualitative study. *Aust. J. Prim. Health* **25**, 176 (2019).

22. De Frel, D. L. *et al.* Participatory Development of an Integrated, eHealth-Supported, Educational Care Pathway (Diabetes Box) for People With Type 2 Diabetes: Development and Usability Study. *JMIR Hum Factors* **11**, e45055 (2024).

23. Desveaux, L. *et al.* A Mobile App to Improve Self-Management of Individuals With Type 2 Diabetes: Qualitative Realist Evaluation. *J Med Internet Res* **20**, e81 (2018).

24. Dsouza, S. M., Venne, J., Shetty, S. & Brand, H. Identification of challenges and leveraging mHealth technology, with need-based solutions to empower self-management in type 2 diabetes: a qualitative study. *Diabetol Metab Syndr* **16**, 182 (2024).

25. Du Pon, E. *et al.* Effects of the Proactive Interdisciplinary Self-Management (PRISMA) Program on Online Care Platform Usage in Patients with Type 2 Diabetes in Primary Care: A Randomized Controlled Trial. *Journal of Diabetes Research* **2020**, 1–10 (2020).

26. Dunkel, A. *et al.* Long-Term Effects of Transtheoretical Model-Based Lifestyle Intervention on Self-efficacy and Self-management in Patients with Type 2 Diabetes — Randomised Controlled Trial. *Int.J. Behav. Med.* **32**, 45–57 (2025).

27. Fuji, K. T., Abbott, A. A. & Galt, K. A. A Qualitative Study of How Patients with Type 2 Diabetes Use an Electronic Stand-Alone Personal Health Record. *Telemedicine and e-Health* **21**, 296–300 (2015).

28. Ghodousi Moghadam, S., Mazloum Khorasani, Z., Sharifzadeh, N. & Tabesh, H. A mobile serious game about diabetes self-management: Design and evaluation. *Heliyon* **10**, e37755 (2024).

29. Gonzalez, J. S. *et al.* Outcomes of New York City Care Calls: A Prospective Randomized Controlled Effectiveness Trial of Telephone-Delivered Type 2 Diabetes Self-Management Support. *The Science of Diabetes Self-Management and Care* **50**, 235–249 (2024).

30. Gosak, L., Pajnkihar, M. & Stiglic, G. The Impact of Mobile Health Use on the Self-care of Patients With Type 2 Diabetes: Protocol for a Randomized Controlled Trial. *JMIR Res Protoc* **11**, e31652 (2022).

31. Goyal, S. *et al.* Evaluation of a Behavioral Mobile Phone App Intervention for the Self-Management of Type 2 Diabetes: Randomized Controlled Trial Protocol. *JMIR Res Protoc* **5**, e174 (2016).

32. Goyal, S. *et al.* The Systematic Design of a Behavioural Mobile Health Application for the Self-Management of Type 2 Diabetes. *Canadian Journal of Diabetes* **40**, 95–104 (2016).

33. Hadjiconstantinou, M. *et al.* Using Intervention Mapping to Develop a Digital Self-Management Program for People With Type 2 Diabetes: Tutorial on MyDESMOND. *J Med Internet Res* **22**, e17316 (2020).

34. Hart, H. E., Geilen, I. E., De Leeuw, E., Rutten, G. E. & Vos, R. C. Internet-based Self-Management Support for Patients With Well-Controlled Type 2 Diabetes: A Real-Life Study. *JMIR Res Protoc* **6**, e47 (2017).

35. Hawkes, R. E., Benton, J. S., Cotterill, S., Sanders, C. & French, D. P. Service Users’ Experiences of a Nationwide Digital Type 2 Diabetes Self-Management Intervention (Healthy Living): Qualitative Interview Study. *JMIR Diabetes* **9**, e56276 (2024).

36. Higa, C., Davidson, E. J. & Loos, J. R. Integrating family and friend support, information technology, and diabetes education in community-centric diabetes self-management. *Journal of the American Medical Informatics Association* **28**, 261–275 (2021).

37. Holmen, H. *et al.* Stages of change for physical activity and dietary habits in persons with type 2 diabetes included in a mobile health intervention: the Norwegian study in RENEWING HEALTH. *BMJ Open Diab Res Care* **4**, e000193 (2016).

38. Izahar, S. *et al.* Content Analysis of Mobile Health Applications on Diabetes Mellitus. *Front. Endocrinol.* **8**, 318 (2017).

39. Jafari, J. *et al.* Designing internet-enabled patient education for self-management of T2D diabetes—The case of the Razavi-Khorasan province in Iran. *PLoS ONE* **16**, e0250781 (2021).

40. Jeffrey, B. *et al.* Mobile phone applications and their use in the self-management of Type 2 Diabetes Mellitus: a qualitative study among app users and non-app users. *Diabetol Metab Syndr* **11**, 84 (2019).

41. Jeon, E. & Park, H.-A. Development of the IMB Model and an Evidence-Based Diabetes Self-management Mobile Application. *Healthc Inform Res* **24**, 125 (2018).

42. Jiang, Y. *et al.* Effectiveness of a nurse‐led smartphone‐based self‐management programme for people with poorly controlled type 2 diabetes: A randomized controlled trial. *Journal of Advanced Nursing* **78**, 1154–1165 (2022).

43. Joachim, S., Forkan, A. R. M., Jayaraman, P. P., Morshed, A. & Wickramasinghe, N. A Nudge-Inspired AI-Driven Health Platform for Self-Management of Diabetes. *Sensors* **22**, 4620 (2022).

44. Johnson, C. M. *et al.* Learning in a Virtual Environment to Improve Type 2 Diabetes Outcomes: Randomized Controlled Trial. *JMIR Form Res* **7**, e40359 (2023).

45. Ju, H.-H. *et al.* A Nurse-Led Telehealth Program for Diabetes Foot Care: Feasibility and Usability Study. *JMIR Nursing* **6**, e40000 (2023).

46. Karlsen, B. *et al.* Assessment of a web-based Guided Self-Determination intervention for adults with type 2 diabetes in general practice: a study protocol. *BMJ Open* **6**, e013026 (2016).

47. Kelly, L., Jenkinson, C. & Morley, D. Experiences of Using Web-Based and Mobile Technologies to Support Self-Management of Type 2 Diabetes: Qualitative Study. *JMIR Diabetes* **3**, e9 (2018).

48. Kim, S. H. & Utz, S. Effectiveness of a Social Media–Based, Health Literacy–Sensitive Diabetes Self‐Management Intervention: A Randomized Controlled Trial. *J of Nursing Scholarship* **51**, 661–669 (2019).

49. Kim, Y., Lee, H. & Seo, J. M. Integrated Diabetes Self-Management Program Using Smartphone Application: A Randomized Controlled Trial. *West J Nurs Res* **44**, 383–394 (2022).

50. Kim, M., Lee, H., Park, G. & Khang, A. R. Participation experience in self-care program for type 2 diabetes: A mixed-methods study. *J Korean Gerontol Nurs* **26**, 31–42 (2024).

51. Krall, J. S., Childs, B. & Mehrotra, N. Mobile Applications to Support Diabetes Self-Management Education: Patient Experiences and Provider Perspectives. *J Diabetes Sci Technol* **17**, 1206–1211 (2023).

52. Krishnakumar, A. *et al.* Evaluating Glycemic Control in Patients of South Asian Origin With Type 2 Diabetes Using a Digital Therapeutic Platform: Analysis of Real-World Data. *J Med Internet Res* **23**, e17908 (2021).

53. Lamprinos, I. *et al.* Modular ICT-based patient empowerment framework for self-management of diabetes: Design perspectives and validation results. *International Journal of Medical Informatics* **91**, 31–43 (2016).

54. Lee, E. Y. *et al.* Efficacy of Personalized Diabetes Self-care Using an Electronic Medical Record–Integrated Mobile App in Patients With Type 2 Diabetes: 6-Month Randomized Controlled Trial. *J Med Internet Res* **24**, e37430 (2022).

55. Lee, H., Park, G., Lee, D., Khang, A. R. & Lee, M. J. Long‐Term Effects of an Automated Personalized Self‐Care Program for Patients With Type 2 Diabetes. *Nursing &amp; Health Sciences* **26**, e70008 (2024).

56. Lee, E.-H., Lee, Y. W., Kang, E. H. & Kang, H.-J. Relationship Between Electronic Health Literacy and Self-Management in People With Type 2 Diabetes Using a Structural Equation Modeling Approach. *Journal of Nursing Research* **32**, e315 (2024).

57. LeSeure, P., Chin, E. & Zhang, S. A Culturally Sensitive Mobile App (DiaFriend) to Improve Self-Care in Patients With Type 2 Diabetes: Development Study. *JMIR Diabetes* **9**, e63393 (2024).

58. Lewinski, A. A. *et al.* Perceptions of Using Multiple Mobile Health Devices to Support Self‐Management Among Adults With Type 2 Diabetes: A Qualitative Descriptive Study. *J of Nursing Scholarship* **53**, 643–652 (2021).

59. Lie, S., Karlsen, B., Niemiec, C., Graue, M. & Oftedal, B. Written reflection in an eHealth intervention for adults with type 2 diabetes mellitus: a qualitative study. *PPA* **Volume 12**, 311–320 (2018).

60. Lie, S. S., Karlsen, B., Graue, M. & Oftedal, B. The influence of an eHealth intervention for adults with type 2 diabetes on the patient–nurse relationship: a qualitative study. *Scandinavian Caring Sciences* **33**, 741–749 (2019).

61. Liu, T. *et al.* Testing the information-motivation-behavioural skills model of diabetes self-management among Chinese adults with type 2 diabetes: a protocol of a 3-month follow-up study. *BMJ Open* **8**, e020894 (2018).

62. Maharaj, A., Lim, D., Murphy, R. & Serlachius, A. Comparing Two Commercially Available Diabetes Apps to Explore Challenges in User Engagement: Randomized Controlled Feasibility Study. *JMIR Form Res* **5**, e25151 (2021).

63. Marini, C. *et al.* Opening the Black Box of an mHealth Patient-Reported Outcome Tool for Diabetes Self-Management: Interview Study Among Patients With Type 2 Diabetes. *JMIR Form Res* **7**, e47811 (2023).

64. Mayberry, L. S., Berg, C. A., Harper, K. J. & Osborn, C. Y. The Design, Usability, and Feasibility of a Family-Focused Diabetes Self-Care Support mHealth Intervention for Diverse, Low-Income Adults with Type 2 Diabetes. *Journal of Diabetes Research* **2016**, 1–13 (2016).

65. Mayberry, L. S. *et al.* Mixed-Methods Randomized Evaluation of FAMS: A Mobile Phone-Delivered Intervention to Improve Family/Friend Involvement in Adults’ Type 2 Diabetes Self-Care. *Annals of Behavioral Medicine* **55**, 165–178 (2021).

66. Mehraeen, E. *et al.* Identifying features of a mobile-based application for self-care of people living with T2DM. *Diabetes Research and Clinical Practice* **171**, 108544 (2021).

67. Mehraeen, E. *et al.* Design and Development of a Mobile-Based Self-Care Application for Patients with Type 2 Diabetes. *J Diabetes Sci Technol* **16**, 1008–1015 (2022).

68. Mohammadi Zeidi, I., Morshedi, H. & Alizadeh Otaghvar, H. A theory of planned behavior-enhanced intervention to promote health literacy and self-care behaviors of type 2 diabetic patients. *Journal of Preventive Medicine and Hygiene* E601 Pages (2020) doi:10.15167/2421-4248/JPMH2020.61.4.1504.

69. Motamed-Jahromi, M. *et al.* Promoting self-care behavior among older adults with type 2 diabetes by the combined mindfulness and self-regulatory intervention via social media: a three-arm cluster randomized controlled trial. *Educational Gerontology* **50**, 320–334 (2024).

70. Nelson, L. A. *et al.* Mobile Phone Support for Diabetes Self-Care Among Diverse Adults: Protocol for a Three-Arm Randomized Controlled Trial. *JMIR Res Protoc* **7**, e92 (2018).

71. Nelson, L. A. *et al.* User Engagement Among Diverse Adults in a 12-Month Text Message–Delivered Diabetes Support Intervention: Results from a Randomized Controlled Trial. *JMIR Mhealth Uhealth* **8**, e17534 (2020).

72. Öberg, U., Isaksson, U., Jutterström, L., Orre, C. J. & Hörnsten, Å. Perceptions of Persons With Type 2 Diabetes Treated in Swedish Primary Health Care: Qualitative Study on Using eHealth Services for Self-Management Support. *JMIR Diabetes* **3**, e7 (2018).

73. Or, C. K. *et al.* Improving Self-Care in Patients With Coexisting Type 2 Diabetes and Hypertension by Technological Surrogate Nursing: Randomized Controlled Trial. *J Med Internet Res* **22**, e16769 (2020).

74. Pal, K. *et al.* Digital Health Interventions for Adults With Type 2 Diabetes: Qualitative Study of Patient Perspectives on Diabetes Self-Management Education and Support. *J Med Internet Res* **20**, e40 (2018).

75. Pamungkas, R. A., Usman, A. M., Chamroonsawasdi, K., & Abdurrasyid. A smartphone application of diabetes coaching intervention to prevent the onset of complications and to improve diabetes self-management: A randomized control trial. *Diabetes & Metabolic Syndrome: Clinical Research & Reviews* **16**, 102537 (2022).

76. Park, S. & Park, J. H. Effects of digital self-care intervention for Korean older adults with type 2 diabetes: A randomized controlled trial over 12 weeks. *Geriatric Nursing* **58**, 155–161 (2024).

77. Pérez-Aldana, C. A., Lewinski, A. A., Johnson, C. M., Vorderstrasse, A. A. & Myneni, S. Exchanges in a Virtual Environment for Diabetes Self-Management Education and Support: Social Network Analysis. *JMIR Diabetes* **6**, e21611 (2021).

78. Prihatin Putri, D. M., Suhoyo, Y., Putri Pertiwi, A. A. & Effendy, C. Integrated Diabetes Self-Management (IDSM) mobile application to improve self-management and glycemic control among patients with Type 2 Diabetes Mellitus (T2DM) in Indonesia: A mixed methods study protocol. *PLoS ONE* **17**, e0277127 (2022).

79. Rangraz Jeddi, F., Nabovati, E., Hamidi, R. & Sharif, R. Mobile phone usage in patients with type II diabetes and their intention to use it for self-management: a cross-sectional study in Iran. *BMC Med Inform Decis Mak* **20**, 24 (2020).

80. Rishaug, T. *et al.* What are end-users’ needs and preferences for a comprehensive e-health program for type 2 diabetes? – A qualitative user preference study. *PLoS ONE* **20**, e0318876 (2025).

81. Ruiz-Leon, A. M. *et al.* Efficacy of a Mobile Health–Based Behavioral Treatment for Lifestyle Modification in Type 2 Diabetes Self-Management: Greenhabit Randomized Controlled Trial. *J Med Internet Res* **27**, e58319 (2025).

82. Safdari, A., Nejat, N., Abolfathi, A., Mehrabi, F. & Rafiei, F. Effect of social media-based education on self-care status, health literacy, and glycated hemoglobin in patients with type 2 diabetes. *Front. Public Health* **13**, 1507726 (2025).

83. Salari, R. *et al.* Mobile-Based and Cloud-Based System for Self-management of People With Type 2 Diabetes: Development and Usability Evaluation. *J Med Internet Res* **23**, e18167 (2021).

84. Sarfati, D. *et al.* BetaMe: impact of a comprehensive digital health programme on HbA1c and weight at 12 months for people with diabetes and pre-diabetes: study protocol for a randomised controlled trial. *Trials* **19**, 161 (2018).

85. Shahshahani, M. S., Goodarzi-Khoigani, M., Eghtedari, M., Javadzade, H. & Jouzi, M. Effectiveness of a web-based program on self-care behaviors and glycated hemoglobin in patients with type 2 diabetes: Study protocol of a randomized controlled trial. *Journal of Education and Health Promotion* **12**, (2023).

86. Sherifali, D. *et al.* The Diabetes Health Coaching Randomized Controlled Trial: Rationale, Design and Baseline Characteristics of Adults Living With Type 2 Diabetes. *Canadian Journal of Diabetes* **43**, 477–482 (2019).

87. Tatara, N., Hammer, H. L., Andreassen, H. K., Mirkovic, J. & Kjøllesdal, M. K. R. The Association Between Commonly Investigated User Factors and Various Types of eHealth Use for Self-Care of Type 2 Diabetes: Case of First-Generation Immigrants From Pakistan in the Oslo Area, Norway. *JMIR Public Health Surveill* **3**, e68 (2017).

88. Torbjørnsen, A., Småstuen, M. C., Jenum, A. K., Årsand, E. & Ribu, L. Acceptability of an mHealth App Intervention for Persons With Type 2 Diabetes and its Associations With Initial Self-Management: Randomized Controlled Trial. *JMIR Mhealth Uhealth* **6**, e125 (2018).

89. Turnbull, S., Lucas, P. J., Hay, A. D. & Cabral, C. Digital Health Interventions for People With Type 2 Diabetes to Develop Self-Care Expertise, Adapt to Identity Changes, and Influence Other’s Perception: Qualitative Study. *J Med Internet Res* **22**, e21328 (2020).

90. Ufholz, K. E., Werner, J. J. & Rao, G. The patient experience in a virtual peer support group for patients with type 2 diabetes and obesity during the corona virus disease 19 pandemic: interview themes from a pilot study. *Family Practice* **42**, cmaf014 (2025).

91. Vallis, M. *et al.* How Continuous Glucose Monitoring Can Motivate Self-management: Can Motivation Follow Behaviour? *Canadian Journal of Diabetes* **47**, 435–444 (2023).

92. Wang, W. *et al.* A randomized controlled trial on a nurse‐led smartphone‐based self‐management programme for people with poorly controlled type 2 diabetes: A study protocol. *Journal of Advanced Nursing* **74**, 190–200 (2018).

93. Woldamanuel, Y. *et al.* Perspectives on Promoting Physical Activity Using eHealth in Primary Care by Health Care Professionals and Individuals With Prediabetes and Type 2 Diabetes: Qualitative Study. *JMIR Diabetes* **8**, e39474 (2023).

94. Wu, Y. *et al.* Effect of Artificial Intelligence-based Health Education Accurately Linking System (AI-HEALS) for Type 2 diabetes self-management: protocol for a mixed-methods study. *BMC Public Health* **23**, 1325 (2023).

95. Xia, S.-F. *et al.* Web-Based TangPlan and WeChat Combination to Support Self-management for Patients With Type 2 Diabetes: Randomized Controlled Trial. *JMIR Mhealth Uhealth* **10**, e30571 (2022).

96. Yaagoob, E. *et al.* WhatsApp‐based intervention for people with type 2 diabetes: A randomized controlled trial. *Nursing &amp; Health Sciences* **26**, e13117 (2024).

97. Yoon, S., Kwan, Y. H., Phang, J. K., Tan, W. B. & Low, L. L. Personal Goals, Barriers to Self-Management and Desired mHealth Application Features to Improve Self-Care in Multi-Ethnic Asian Patients with Type 2 Diabetes: A Qualitative Study. *IJERPH* **19**, 15415 (2022).
